# Supplementary material
Source: PubMed Central journal article supplement (PMC5217750)
Supplement: NIHMS836046-supplement-Fig_S13_export.pdf [file NIHMS836046-supplement-Fig_S13_export.pdf]

At3g48510.1 DIG1  
At3g27250.1 DIL4  
At5g40790.1 DIL2  
At5g40800.1 DIL3  
At5g50360.1 DIG2  
At5g63350.1 DIL1  
Solyc03g111100.1  
Solyc02g093890.1  
Solyc02g068030.1  
GLYMA19G22560.1  
GLYMA17G13720.1  
GLYMA06G18060.1  
GLYMA05G06810.1  
GLYMA05G03080.1  
GLYMA04G36920.1  
Osl2g0242500-01  
GRMZ2G084005\_P01  
At1g27461.1  
Os07g0585700-01 Sdr4  
GRMZ2G396402\_P01  
GRMZ2G105302\_P01

MDG-RGGCCI-ARYA-----IGSGPYDLSKADRIMLRFPRIAPKPAASPGGVNPSVSSGSDG-----GGSSDVSFRSAS-RRKRKCHQLKENG-----N-----  
MD--QDDWLGLTLRYA-----GKAQDKVSDALMLRFRPIAPKPTTQPCGVADNNMNS-----SYGMSK--RTRKRYVVRVSKNN-----  
MHG-NKQCCQ-ASIC-----DGATDQDRVTYVSIKMQRRFRPIAPKFAVGGSSDDTNSDRFL-----GNR--RSKRKYVRVDKNN-----S-----  
MQDDHELWRT-LRCA-----GKAQDKTSVDTMLMKYRPIAPKPTTTGQPLVGDTSSTR-----VITNVSRSR--RGRKRYSKENSSSTGSGVN-----S-----  
MNF-RGGCCI-ARYG-----GSGGNDMSKVRDMLRFRPIAPKPDSDGSPASPTEKNGS-----VITNVSRSR--RGRKRYSKENSSSTGSGVN-----S-----  
MDG-RGGCCI-ARYG-----GYGGRYGLSKADRIMLRFRPIAPKPAASDGGVSVLTKGSGS-TTTTSGGSSDLSGKSG--RGRKRYQKDCSGGN-----S-----  
MDG-RGGCCI-ARYA-----GGAYDMSKVRDMLRFRPIAPKPAAGTSSVSTGTPPQ-----KSEVPVTRG--RWKRYVVDKNNNSN-----N-----  
MDL-ANTWAG-PGYT-----PTPKDITLINQMMLRFRPIAPKPVNDSGPPETHVVAN-----RRTRKRYVVRK-----  
MDG-GNGFPA-ARYA-----GKNDTITMNRIMLRFRPIAPKPVAGSSDGTSPENN-----MELVTKR--RAKRYVVRKSSK-----C-----  
MDS-ADAWR-AAAC-----NSNVNIMLRFRPIAPKPVGTISAAEAGSAVGE-----VTQNHVSVLKG--RPRKRYVVRIRNSG-----Y-----  
MDG-RGGCCI-ARYV-----PGASHGTSVKDMLRFRPIAPKPAAGTSSVSTGTPPQ-----DAFLKNG--TTRKRYVVRDNYTS-----Y-----  
MSS-YKFTPL-PSLL-----LQPPSTRAAYNMLRFRPIAPKPLPSAALSDDSSFSSEN-----TG--VSKRMDTSGKSCS-----  
MDG-ADAWR-AAAC-----NTNVNIMLRFRPIAPKPVAGSSAVSRATGAGD-----GSQSSHVSVLKG--RPRKRYVVRIRNSG-----Y-----  
MDL-RGGCCI-ARYV-----PGASHVTSVKDMLRFRPIAPKPAAGTSSVSTGTPPQ-----DAFLRNG--NTRKRYVVRDNYTS-----K-----  
-----MSKMDKIMLRFRPIAPKPLPAAAAALSDDSSSE-----STG--SAKRKNDTAKRCS-----  
MER-KGGCCLAPRYAASAAAAAGAGGQAAMWQMRIMLRFRPIAPKPAAPAPAVGAGVAGK-----GKRKAVSGGGGRRGRKPKKAATAATLAPAHAPAPAPVAGTKPVKLVG  
MER-KGGCCLAPRYA-----ATAAAQGAAGWQMRIMLRFRPIAPKPAAPAPASAPVTSAGAGRGRKKAACGGGRRGRKPKKAAKVAMVTAAPATAAAQDVGDG  
-----MIKILNPHSH-----HSQTTTLKTAELISKYRPIAPKPTPRVNDPSSSS-----HKISQSPYLRLNLWQLQARPTTRKRGRGMMGPSSLAMKR-----P-----  
-----MAMV-----QPVDMAVKANEIMLRFRPIAPKPVLPAAAAAGVTGGGDD-----AAVAATNRVLCQLQSRPRARKRGRPSVPPSPAGA--K-----  
-----MAMV-----QPADTAVKANEILLARFRPIAPKPLAAAAAAAAPVQA-----AAEGVVAANRVLCHLQSRPRARKRGRPTVVPVPSKSGAQ--P-----  
-----MAMV-----QPADTAVKANEILLARFRPIAPKPLAAEGVVAANRVL-----HLQGRPCRARKRGRPGFVAVPSPESGLQ--P-----

At3g48510.1 DIG1  
At3g27250.1 DIL4  
At5g40790.1 DIL2  
At5g40800.1 DIL3  
At5g50360.1 DIG2  
At5g63350.1 DIL1  
Solyc03g111100.1  
Solyc02g093890.1  
Solyc02g068030.1  
GLYMA19G22560.1  
GLYMA17G13720.1  
GLYMA06G18060.1  
GLYMA05G06810.1  
GLYMA05G03080.1  
GLYMA04G36920.1  
Osl2g0242500-01  
GRMZ2G084005\_P01  
At1g27461.1  
Os07g0585700-01 Sdr4  
GRMZ2G396402\_P01  
GRMZ2G105302\_P01

-----AKRCTRRTSKDKPVVH-----GSAN-----AVTLS-LL-PEKPIDLKAAVE-----KQKRQGP-----LWLSF  
-----KTCRCRKSRLSDDR-----EQTD-----VITLQ-LL-PEKSDISEYSPLDQDLSLPS-----VKSIIEETQETNTWGMF  
-----SGSNKKDITGKNGK-----DRGNIKTDLKIDGDDRTD-----VITLQ-LL-PEKDRDIGNGDKAGEFCS-----DLSMDP  
-----KATCRSKTNGFRSSST-----DPENGRED-----IVTLQ-LL-PERSTPLSLDHNLDPT-----VETTINGDETCNTDWTWLF  
-----NGNSKQRNDERTKNGS-----GGGRE-----IVTLQ-LL-PETPEKDKSP-----LKAKAPELGAALWLSF  
-----RRCNKKRDLSDGTAT-----TT-----AVTLS-LL-PETPEKRVFPDLNAPVVE-----KQKNGP-----LWLSF  
-----NKRSSSGCCSPTPSRR-----KRRKARSVEENDSASAKVSGGETAVTLQ-LL-SEIPEKRDNSVD-----MMKNAP-----IWLFS  
-----KKNKNSKKEKSDGLLDE-----VITLQ-LL-PESSGGVKTSPEDR-----SYPTIN-----FLVQL  
-----KSNKEDEANKDGSLLY-----EDNGA-----GITLQ-LM-PQSSSGVRSNL-----ENSGRSP-----FMMNF  
-----VRKNNGDSNGKSNNG-----NDESSDVA-----VITLQ-LM-PEKDAPEGDVTLAGDSWCKNVLDLVEKIQI-----VENRSAP  
-----KRRIRRRKNTSSPEKK-----QP-----VITLQ-LL-PETPDRKRSKADLTPSPAKPVNRNNNNNNKSNLNIINKNVP-----VWVSF  
-----RGIRRRRNAPPPIPPP-----PP-----AVTLP-LL-PETPDKKTTSE-----LKNKNVP-----VWLSF  
-----VRKNNGNSNRKSNKNC-----NDESSDVA-----VITLQ-LM-PEKDAPEGDVTLAGDSWCKNVLDLVEKIQI-----VENRSAP  
-----RRCRKNSSNSPEQK-----QKQTT-----AVTLP-LL-PETPDRKDFPAKDLTPSPVNRN-----LKNKNVP-----VWVSF  
-----RGIRRRRNAPPPIPPP-----AVTLP-LL-PGSPGPKITSE-----LKNKNVP-----VWLSF  
DCKEMEREKEKESLSSPSSS-----SSGMSVSSPPPPP-----SAMPL-LL-PVRLDITTT-----TPPVAP  
-----REHCDKESKSSSPSSS-----SSGTSVSDSPPRPQQRQ-----LATLP-LM-PVTAEDKAAA-----CPATVGP  
-----KSSCGSSSTISTQRLVLPKIKTSLFQAFTHHRLNLPQVGVFVGVSSSTLVTLP-LL-QCSPSSKCMPEIKRQVI-----DLNKTAEVIQERDITLQ  
-----RKRAPAYVAPLRC-----AAVATARTARVSVVVVPAFAGVSA-LA-----VPSPSAGDSTRLSPTVVEVEDE-----DEERGVP  
-----PAKRRASTPYPLRC-----AAATTAHVV-----SAVVGSA-----RLPASPAGVEDIAKAAAAAAT-----EERDVP  
-----PAKRRATTPYPLRC-----TGPRASAVPG-----SAGLP-LASASLPAGAGAAEDLAKVA-----AERHVP

At3g48510.1 DIG1  
At3g27250.1 DIL4  
At5g40790.1 DIL2  
At5g40800.1 DIL3  
At5g50360.1 DIG2  
At5g63350.1 DIL1  
Solyc03g111100.1  
Solyc02g093890.1  
Solyc02g068030.1  
GLYMA19G22560.1  
GLYMA17G13720.1  
GLYMA06G18060.1  
GLYMA05G06810.1  
GLYMA05G03080.1  
GLYMA04G36920.1  
Osl2g0242500-01  
GRMZ2G084005\_P01  
At1g27461.1  
Os07g0585700-01 Sdr4  
GRMZ2G396402\_P01  
GRMZ2G105302\_P01

-----KDGGMGLTPAYQTEIYQRTVVISS-----CMTVERVT-----D-AWI-----DG-YG-----LGRSD-----EERKMNVLDTCPGFLISSSGFWTNDAYRKMA--RDIIP  
-----NGSVTAE-----MET-----WTVVESVT-----S-VEGSLSS-HA-----VGITD-----VEIVDNLGHCDFAPVSSGSRNWWNEAYRRNV-----SGD  
-----KKSLYNSIIGLSSS-----FDRVYVES-----WLTVECVS-----D-TCT--DLGWYHILEQLGRMDQAEERVMRMLVEDCPWLVSSGSRNWWNEAYRRNV-----GAP  
-----NGDDALQ-----QVPVET-----WTVVESVN-----SGLVS-----HA-----VGLTD-----EELTYALDHCDFAPVSSGSRNWWNEAYRRNV-----TGD  
-----NDGASYNRRYQTELMET-----VWSS-----LTVVECVT-----E-RLM-----EGEYE-----LGCTD-----EERKMNVLDTCPGFLISGLGRWNTNAYRRNV-----VCK  
-----NGGEEILTPYKTAESIIRTSVWVSS-----CVTVERVT-----D-AWI-----DG-YG-----LGETN-----QERKMNVLDTCPGFLISGLGRWNTNAYRRNV-----VGP  
GNQGNNNNSNNNNQLQGVAMDR-SVVMFPQVRRVWGS-----WVWVDSVT-----D-AWV-----EG-YG-----LGRSD-----EELINLEPDCDFAPVSSGSRNWWNEAYRRNV-----DP  
-----DRSIWINKNLLSIGAP-----DPSVEIRSPMVWES-----WVVDGLT-----NTTFV-----DL-SA-----LGSTD-----MEKMMNLQRCDFAPVSSGSRNWWNEAYRRNV-----DP  
-----QKSENSEIFPVGSDQIDRTVEMQKRVVES-----WVMDQIT-----N-ALV-----DG-EA-----LGSTD-----TEKMNLEPDCDFAPVSSGSRNWWNEAYRRNV-----DPL  
-----PRAAAEEGEGKRSDLVAAKVAES-----WTVVESVT-----G-TCMGEGDG-EGGRGLDCTD-----AEKVSLEADCPDFAPVSSGSRNWWNEAYRRNV-----LEGR  
-----ENRSLTMMGG-----WCS-----CVTVEGVT-----D-TCL--ES-EW-----LGSTD-----EERLNLSDTCPGFLISGLGRWNTNAYRRNV-----GAP  
-----ENSFNKRGGTASEKDLVPCWYSPA-----AGS-----VTVVECVM-----D-RMQPQEEG-LG-----LGRGD-----VERKVLDTCPGFLISGLGRWNTNAYRRNV-----LEGR  
-----PRLVVEEGEGAGKDLVPAKAAES-----WTVVESVT-----G-TCMGEGEGGR-----LLSCTD-----EERKVSLEADCPDFAPVSSGSRNWWNEAYRRNV-----LEGR  
-----ANRSLTMMGG-----WCS-----CVTVEGVT-----D-TWV-----EG-EW-----LGSTD-----EERKVNLSHTCPGFLISGLGRWNTNAYRRNV-----EGD  
-----ENNFNRRGAASEKLDPCWYSQATAAGS-----VTVVECVM-----D-TWQOQDEG-LG-----LGSDD-----EERKVKLEDTCPGFLISGLGRWNTNAYRRNV-----LEGR  
-----AHAQAQSVVAPPFRALLPAAA-----VTVVECVT-----S-WVR-----DGSG-----AARAGD-DGCAAPVSSGSRNWWNEAYRRNV-----AP  
-----ELVPSQVTAARPLAPRMRPAAAAAYLVVEEVT-----A-TWR-----DG-----EPASATGHEEAPVSSGSRNWWNEAYRRNV-----SAD  
-----QGPIITTTTATTSRVSIPQPIRVPVCS-----KINVAYIN-----PLTNPSPTSQT-----SKKSP-----REVEEDVESDLPVSSGSRNWWNEAYRRNV-----GQP  
-----LVERDLLRKLLEP-----RVLLEPFRVPRVGS-----THVSVHIDVGRITA-----AAAA-----APKTA-----EVEAELESLSLPAVSSGSRNWWNEAYRRNV-----GQP  
-----VERDLLRKLLEP-----RVSIFRAVPRVMS-----AIHVGCIRHTDDAACT-----DAA-----VSKTA-----VQVEAELEVALPAVSSGSRNWWNEAYRRNV-----GQP  
-----VERDLLRKLLEP-----KVISFRAVPRVCS-----AIHVGCIRHADA-TCA-----AA-----VSKTA-----VRVEAELEVALPAVSSGSRNWWNEAYRRNV-----GQP

At3g48510.1 DIG1  
At3g27250.1 DIL4  
At5g40790.1 DIL2  
At5g40800.1 DIL3  
At5g50360.1 DIG2  
At5g63350.1 DIL1  
Solyc03g111100.1  
Solyc02g093890.1  
Solyc02g068030.1  
GLYMA19G22560.1  
GLYMA17G13720.1  
GLYMA06G18060.1  
GLYMA05G06810.1  
GLYMA05G03080.1  
GLYMA04G36920.1  
Osl2g0242500-01  
GRMZ2G084005\_P01  
At1g27461.1  
Os07g0585700-01 Sdr4  
GRMZ2G396402\_P01  
GRMZ2G105302\_P01

VEEGAPEITSDSFHVI--VRLVMRER-----PMLTS-----PGTFRMK-LQYTCQNRBERGSVTVBCDWRMDVGGG-----FAWRL-----DVKAALCL-----  
DSTAS-----VSEPVV--VNLVAEEATAA-----MHCNY-----QAFTRVR-MQYTW-KETKYTKTVECDWVKME-FGG-----FAWRL-----DITAALTLWL-----  
DVDVI-----R--VNLVVAMDLMEEIACMVLEL-----YGAVTNRV-VRVYEP--STWRKMTVPCDWRIR-SCG-----FAWRL-----DVESALRLGM-----  
GGFGR-----EVI--VNLVVDQTA-----TFCDY-----RTFTNRV-MEYTW-RETQYTKTVECDWVKME-FGG-----FAWRL-----DITAALTLWL-----  
DHEQC-----SKMS--VNLVMKEK-----PLVTY-----RTFTNRV-LQYTCRDEKVESSITSECDWRMS-DGG-----FAWRL-----DVDALCLR-----  
MEEGVPEDISYDNFHVN--VRLVMKER-----PMLTY-----PAFTNRV-LQYTCQDRERGSVTVBCDWRMD-GGG-----FAWRL-----DVKAALCL-----  
-GDGA-----GEVV--VNLVMKDA-----VRLPESKSTAFTNRVVR--C-GKEKNSLILBCDWRMD-GGG-----FAWRL-----DTEAALLSLGR-----  
EEEGG-----EATEMV--VRLVVKEDKRAPVLLLSLPS-----FACIVR-IVYTW-NKVKQSRTPMCDWVKMD-CGG-----FAWKF-----DAKAALLSLGR-----  
EGSN-----SPELV--TWLVVKEK-----ILLPN-----SSAFIVR-ILYT-----KNSQTMPCDWRKME-FGG-----FAWRL-----DAKAALLSLGR-----  
EGEGE-----NIV--VNLVKVDSA-----TASWVCYSHPAFTNRV-LQYTW-RNEKCTKMBVCDWRDL-CGG-----FAWRL-----DVKAALLSLGL-----  
EQGPF-----VLLVNKVN-----IASWV-----ASFTLVRVQYVQSC-GKERNLTVBCDWRMD-CGG-----FAWRL-----DVKAALLSLGLY-----  
-GEGC-----VNLAMKVT-----VPLCY-----RGETNRV-VQYAC-KRER-----TVPCDWRM-SGG-----FAWRL-----DVKAALLSLSLAL-----  
KGECE-----DIM--VNLVKVDSA-----CAAWCYSHPAFTNRV-LQYTW-RNEKCTKMBVCDWRDL-CGG-----FAWRL-----DVKAALLSLGL-----  
EQGPF-----VLLVNKVN-----TVVPH-----ASFTLVRVQYVQAC-GRESSLTVBCDWRMD-SGG-----FAWRL-----DVEALSRLGLY-----  
-GAGG-----VNLAMKVA-----VVPYV-----RGETNRV-VRVYAC-GIER-----TVBCDWRMD-SGG-----FAWRL-----DVKAALLSLSLAF-----  
DAAAP-----DQAR--VALAARDGDA-----AAVPAWGTCAAGTNRV-VHPSYSPRRSSVVAACDWRDL-AGG-----CYLWRL-----DLQAALLSLGALP-----  
GDGEA-----DAAAP-----GALPWAAGTCAAGTNRVRAHWSA-RRVGSVVAACDWRDLAAGS-----YLWRL-----DLQAALLSLGCL-----  
ECSWL--DSMVRGRKIC--GEVMINFC-----SKIPVMTENNCSVNR-IDWGR-DGKEEYMHACDVTKLA-CDSDYVFTWRF-----HTTDRR-----  
ECPWLDAVATAASRRISGEVALVSEVAAA--AALPE--TKGFSIAK-IAWER-DGKNSVHABCDVTRLD-CESRDYFAWRF-----RAAGDECNTHRAAGDA-  
GRMZ2G396402\_P01 ECPWL-DAVATAASRRISGEVALVADR-----SSLPE--SYGAFPTAK-IWED-DGKVASIDVBCDWRDL-CESRDYFAWRFRTAADADASVGSSEISES  
GRMZ2G105302\_P01 ECPWL-DAVATAASRRISGEVALVANO-----SSLPE--SYGAFPTAK-IWED-DGKVASIDVBCDWRDL-CESRDYFAWRFRTAADADASVGSSEISES
