# Supplementary material
Source: PubMed Central journal article supplement (PMC5217750)

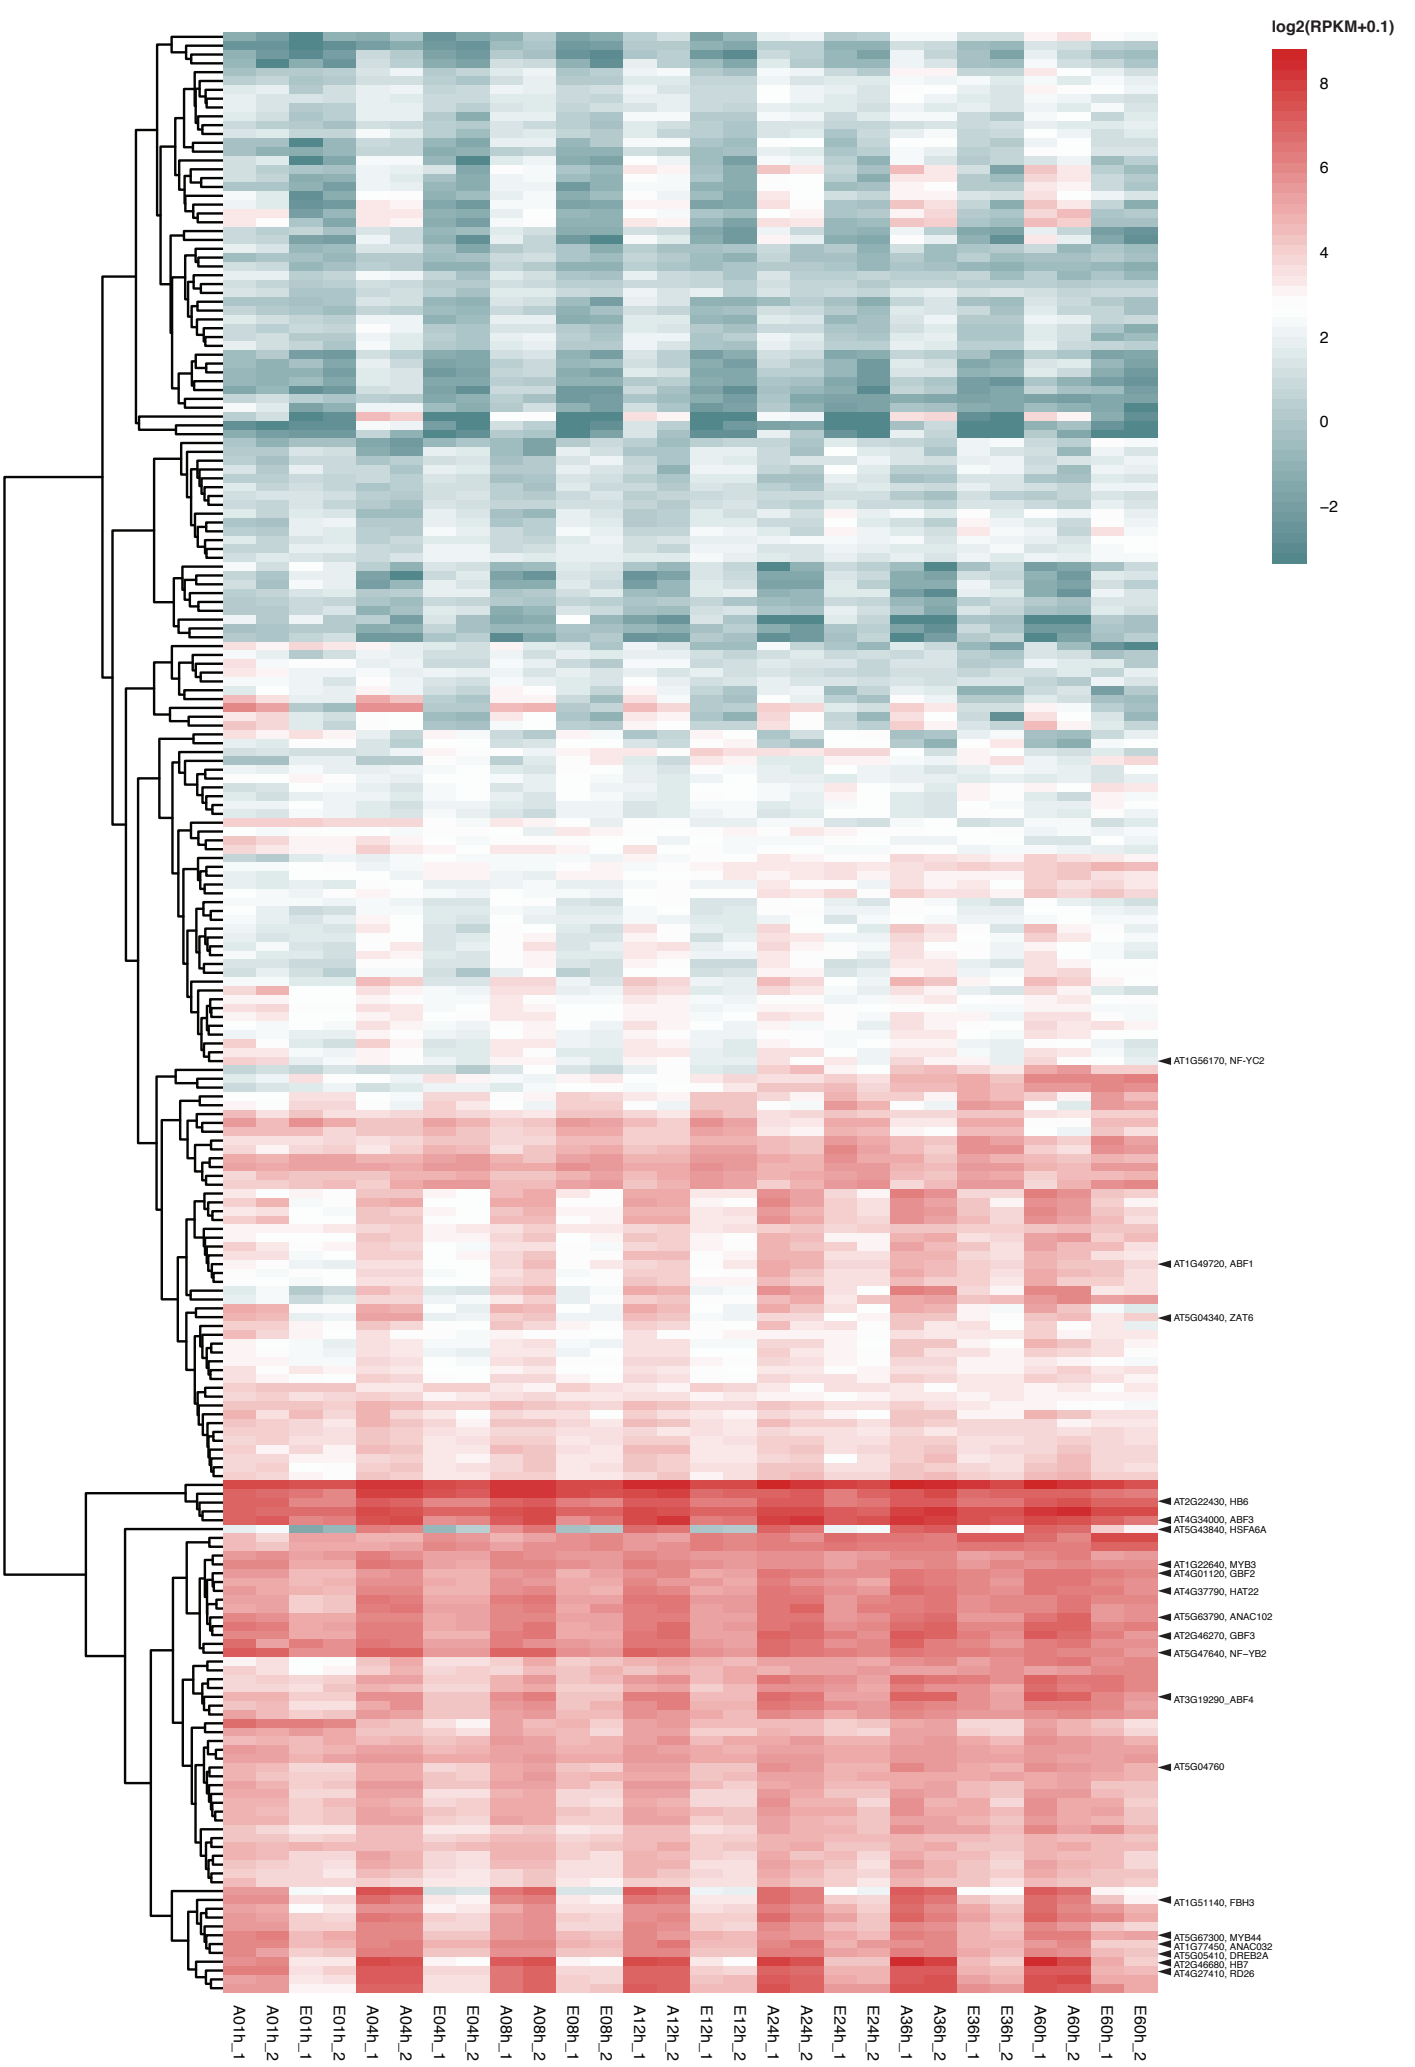

Supplement: NIHMS836046-supplement-Fig_S02_export.pdf [file NIHMS836046-supplement-Fig_S02_export.pdf]

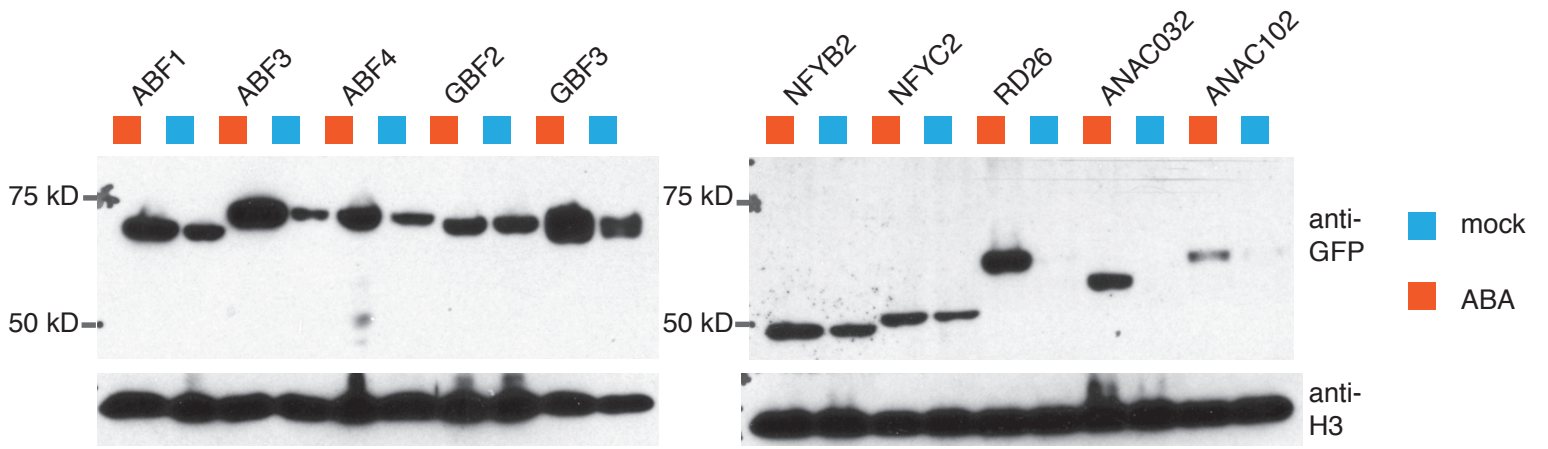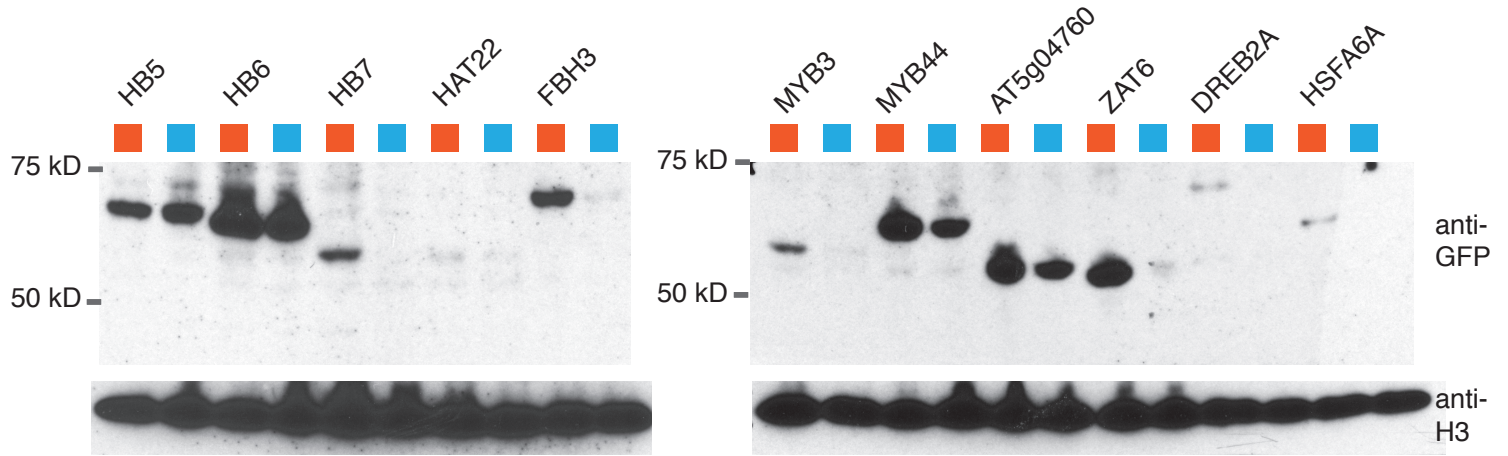

Supplement: NIHMS836046-supplement-Fig_S03_export.pdf [file NIHMS836046-supplement-Fig_S03_export.pdf]

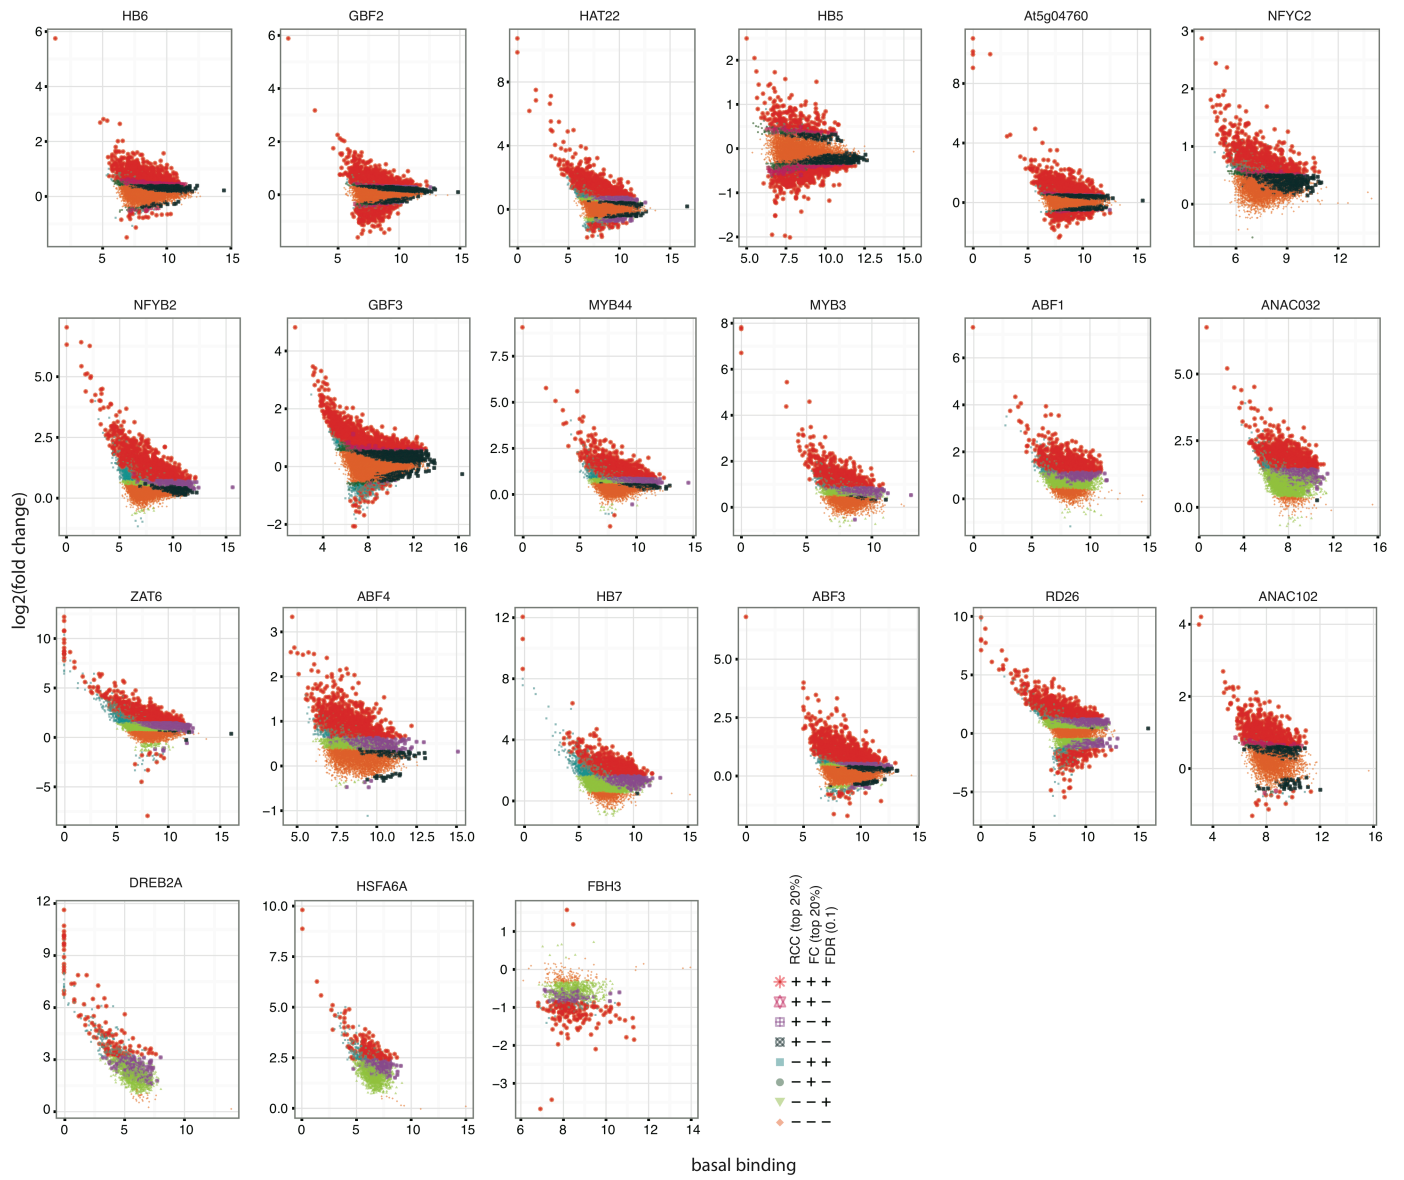

Supplement: NIHMS836046-supplement-Fig_S04_600ppi_export.pdf [file NIHMS836046-supplement-Fig_S04_600ppi_export.pdf]

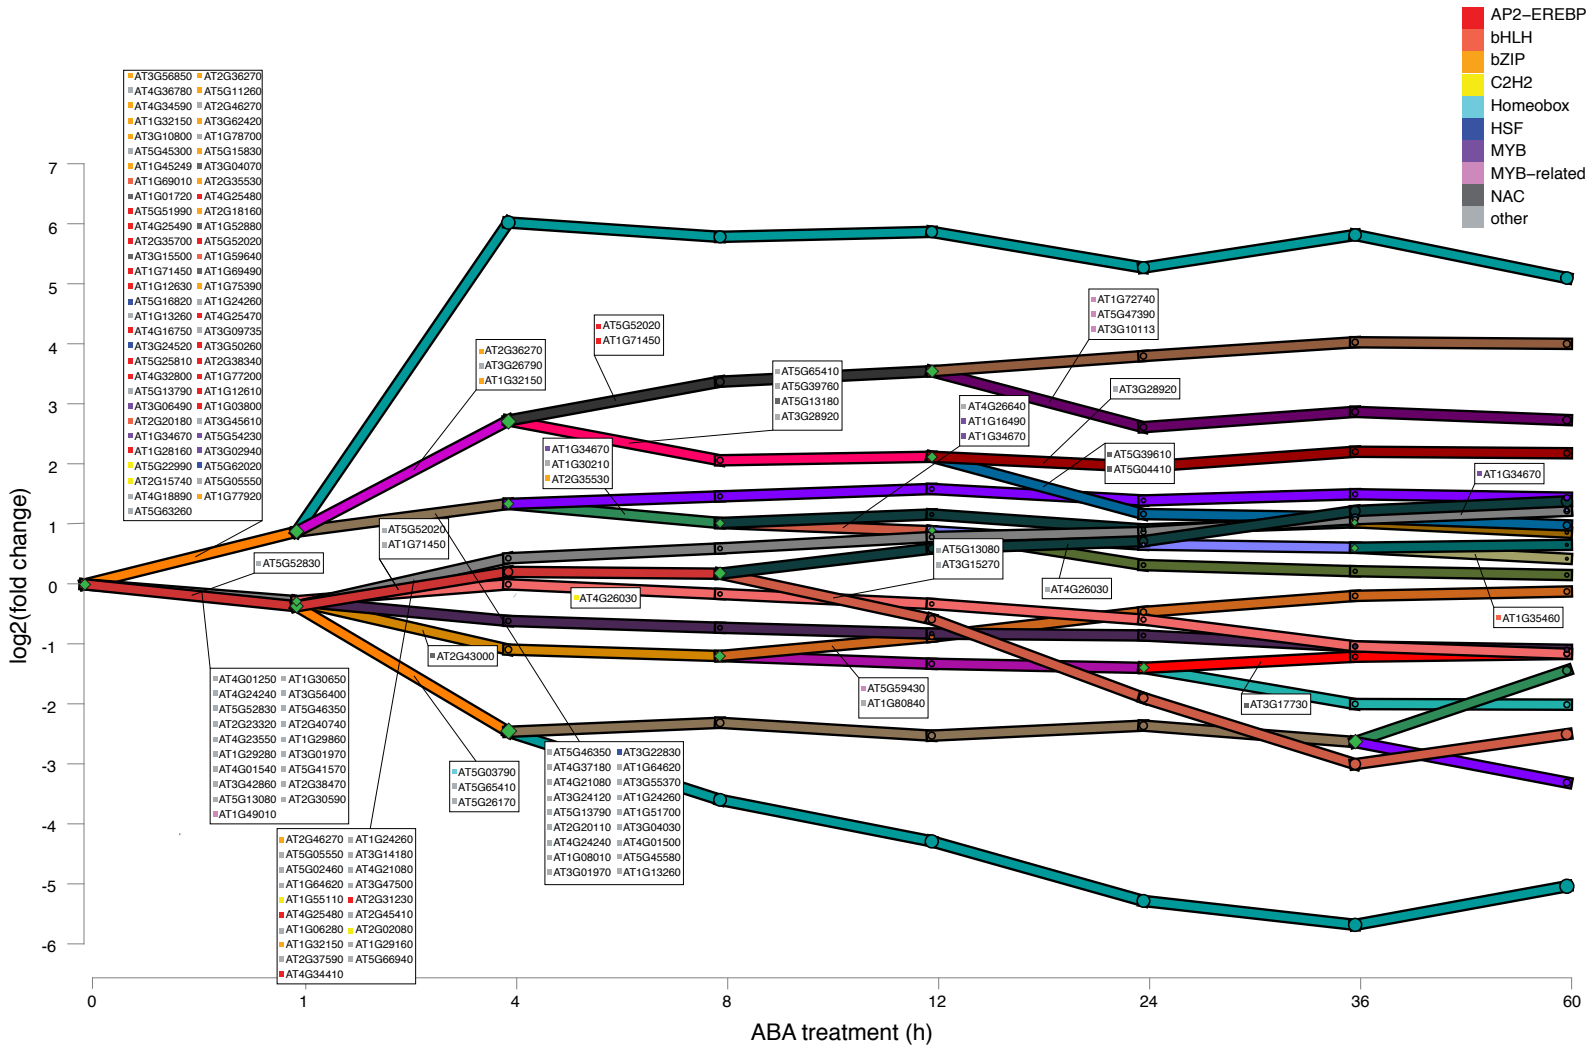

Supplement: NIHMS836046-supplement-Fig_S05_export.pdf [file NIHMS836046-supplement-Fig_S05_export.pdf]

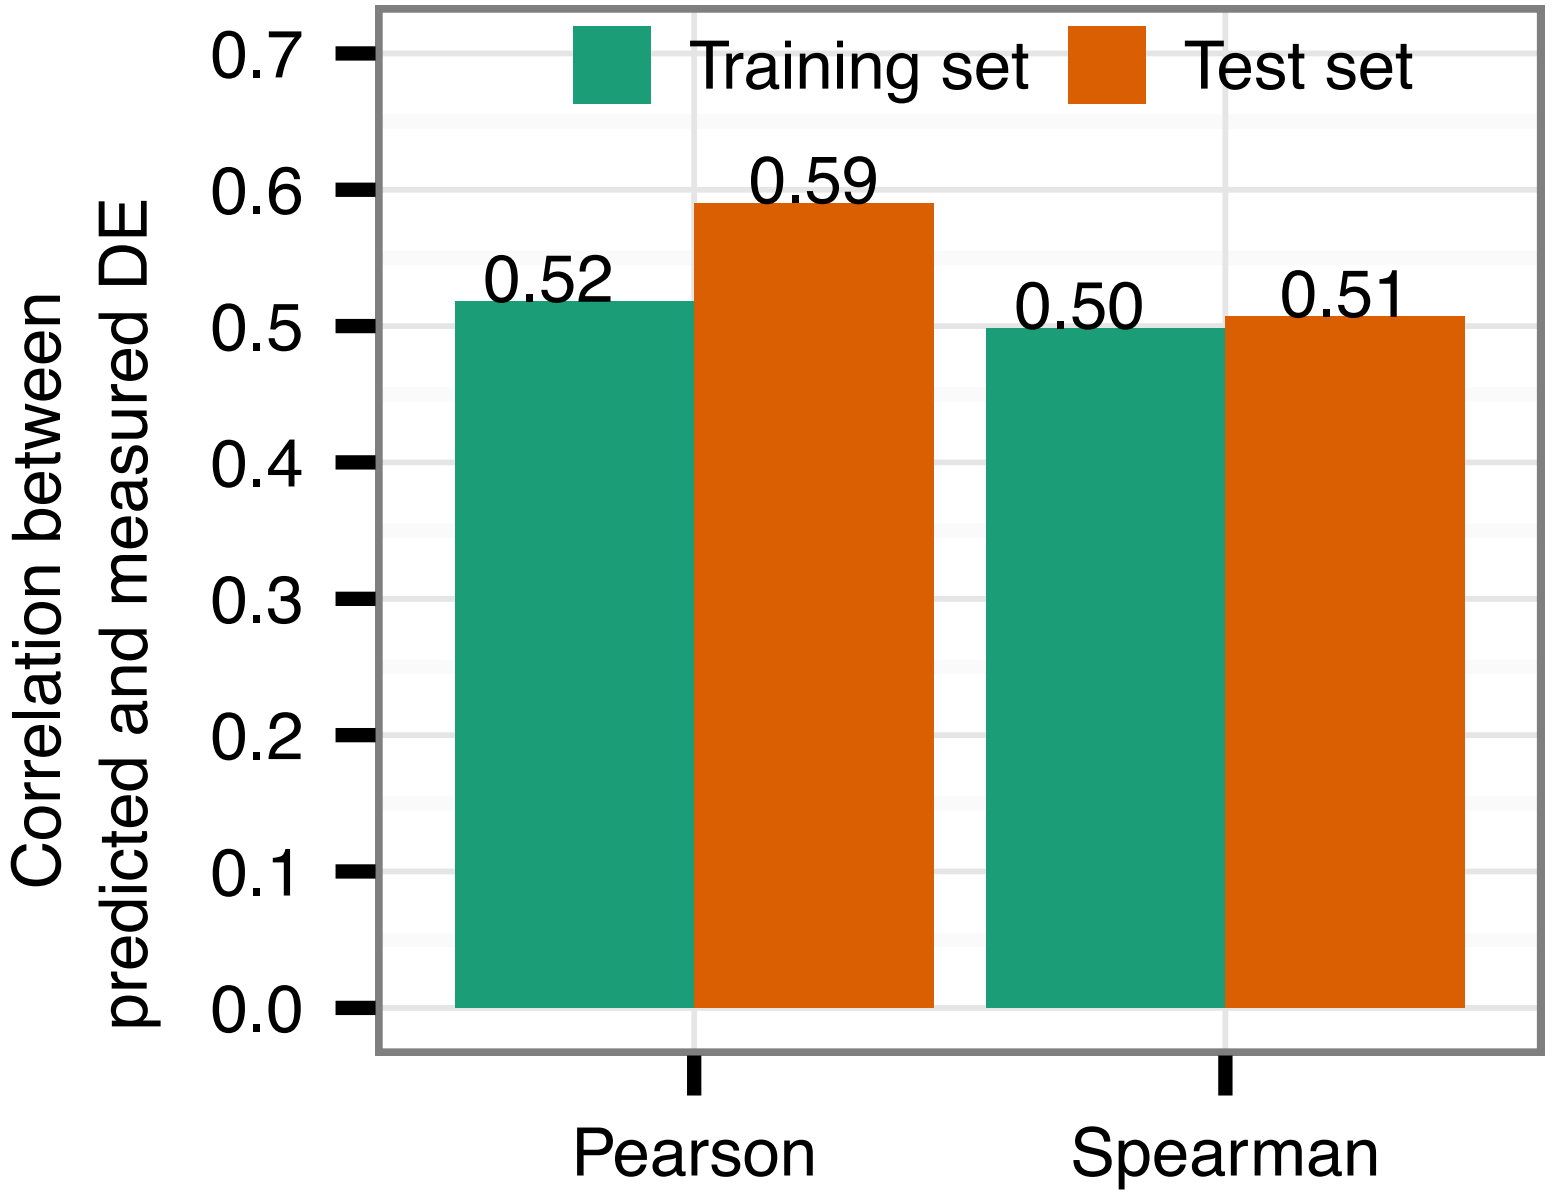

Supplement: NIHMS836046-supplement-Fig_S07_export.pdf [file NIHMS836046-supplement-Fig_S07_export.pdf]

**A***RGL3*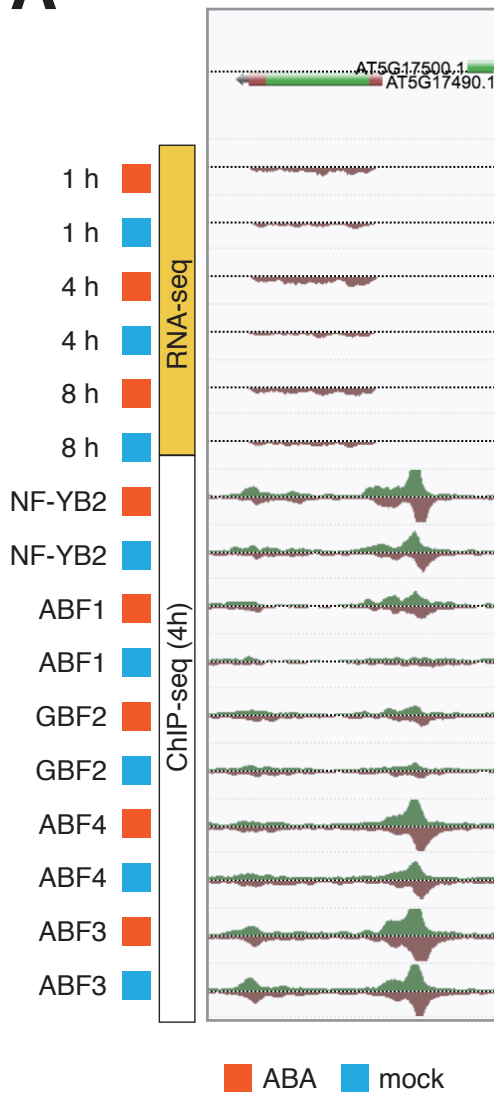**B***ACS2*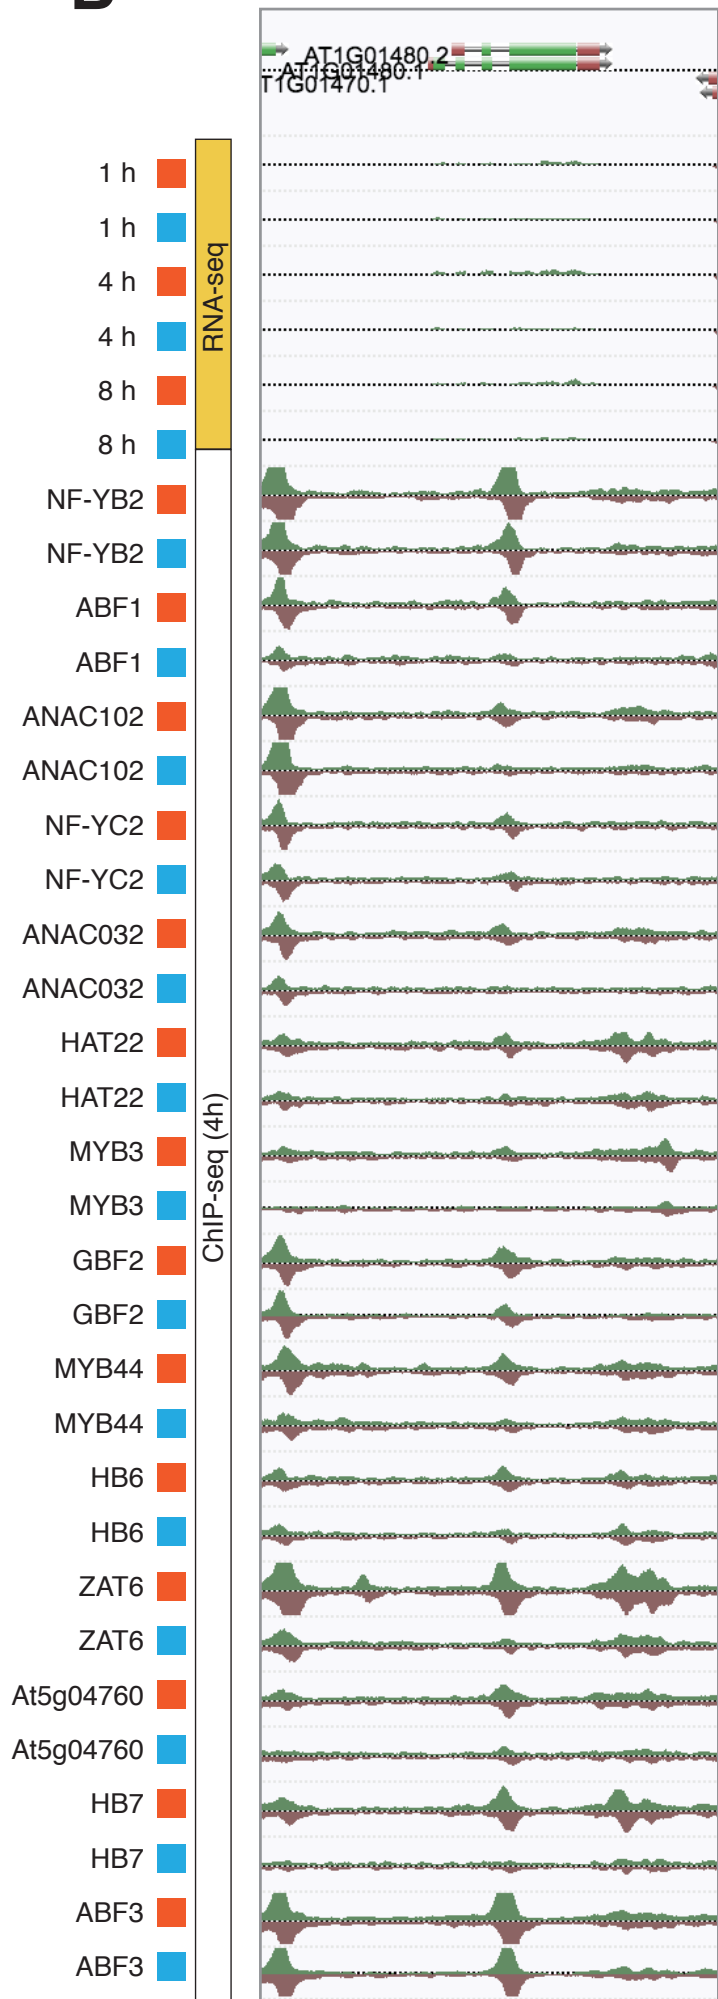

Supplement: NIHMS836046-supplement-Fig_S11_export.pdf [file NIHMS836046-supplement-Fig_S11_export.pdf]

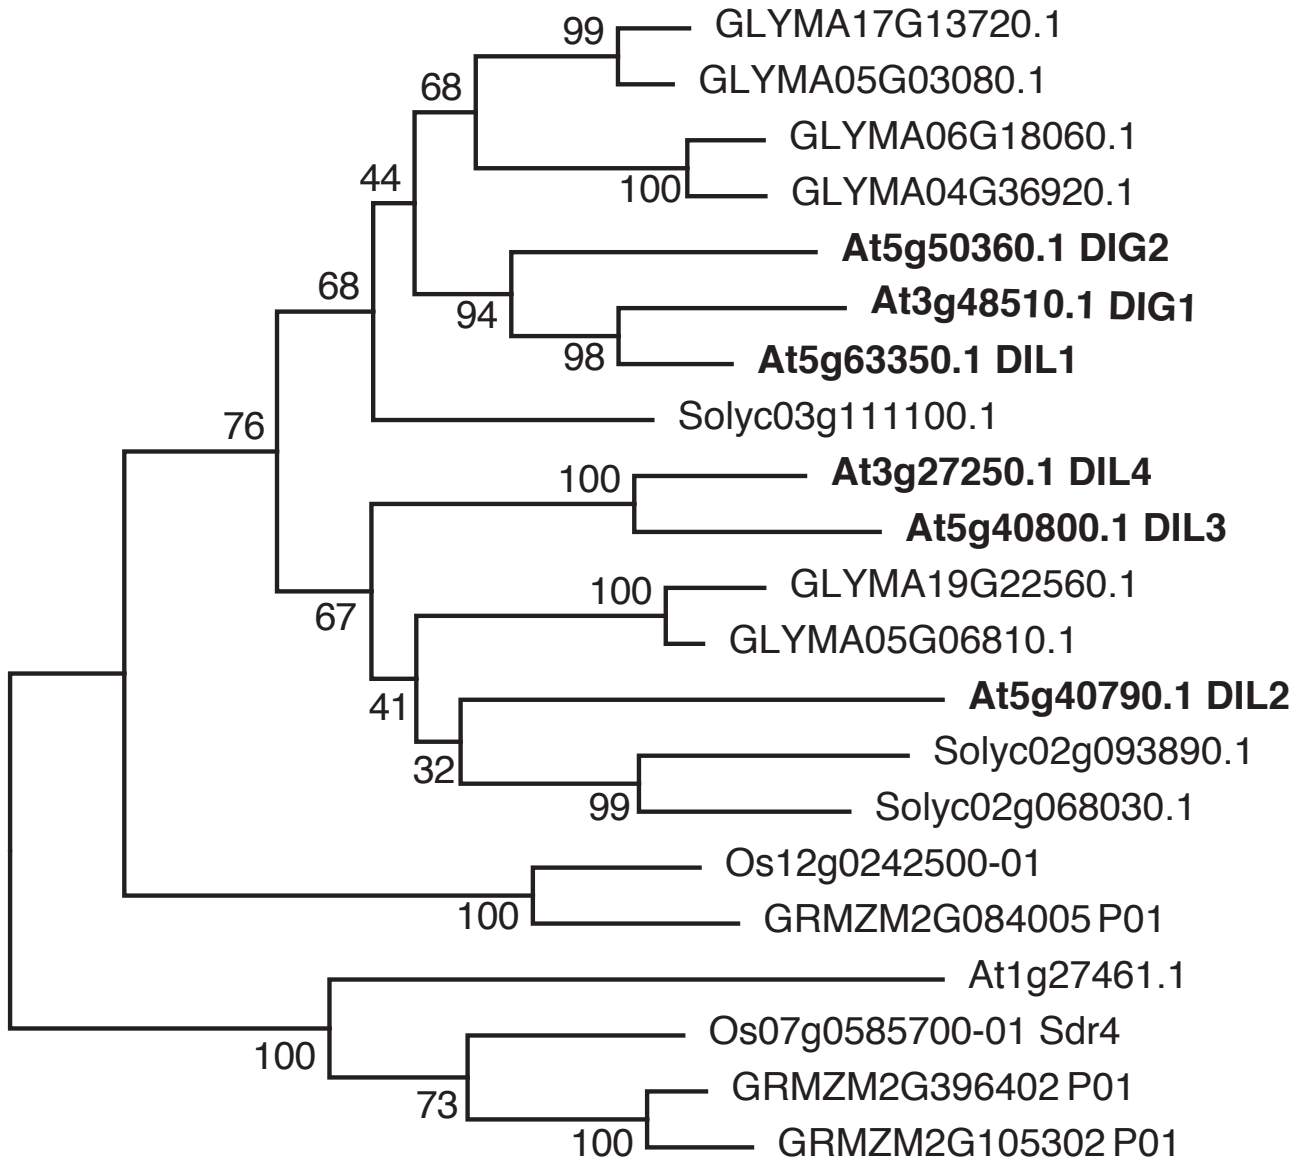

0.2

DIG clade

Sdr4 clade

Supplement: NIHMS836046-supplement-Fig_S12_export.pdf [file NIHMS836046-supplement-Fig_S12_export.pdf]
